# Renal Hyperfiltration and Arterial Stiffness in Humans With Uncomplicated Type 1 Diabetes

DAVID Z.I. CHERNEY, MD, PHD<sup>1</sup>  
ETIENNE B. SOCHETT, MBCHB<sup>2</sup>  
VESTA LAI, RN<sup>1</sup>  
MARIA G. DEKKER, RN<sup>2</sup>

CAMERON SLORACH, RDCS<sup>3</sup>  
JAMES W. SCHOLEY, MD<sup>1</sup>  
TIMOTHY J. BRADLEY, MBCHB<sup>3</sup>

**OBJECTIVE** — We have reported that renal hyperfiltration is associated with endothelial dysfunction in early type 1 diabetes. However, the relationship between renal hyperfiltration and arterial stiffness is unknown. Accordingly, we measured arterial stiffness in type 1 diabetic subjects with hyperfiltering ( $n = 20$ ) or normofiltering ( $n = 18$ ).

**RESEARCH DESIGN AND METHODS** — Augmentation index (AIx), aortic pulse wave velocity (PWV), renal hemodynamic function (inulin and paraaminohippurate clearances), and urinary and circulating plasma cGMP were measured in normoalbuminuric subjects with type 1 diabetes during clamped euglycemia (glucose 4–6 mmol/l) and hyperglycemia (glucose 9–11 mmol/l).

**RESULTS** — During clamped euglycemia, hyperfiltering subjects (glomerular filtration rate  $\geq 135$  ml/min/1.73 m<sup>2</sup>) exhibited lower AIx values ( $-6.1 \pm 2.9$  vs.  $13.9 \pm 2.7\%$ ,  $P = 0.001$ ) and higher cGMP levels in urine and plasma compared with normofiltering subjects. These differences were maintained during clamped hyperglycemia. As expected, renal hemodynamic responses to clamped hyperglycemia were exaggerated in normofilterers, but values for AIx remained unchanged.

**CONCLUSIONS** — Renal hyperfiltration is associated with reduced arterial stiffness in subjects with uncomplicated type 1 diabetes.

*Diabetes Care* 33:2068–2070, 2010

Early type 1 diabetes is associated with renal hemodynamic function changes characterized by arteriolar vasodilation and hyperfiltration (1). In addition to renal microvascular vasodilation, previous work has suggested the presence of macrovascular arterial dysfunction in diabetic subjects with renal hyperfiltration, which may reflect generalized endothelial dysfunction (2). In addition to effects on endothelial function, diabetes is associated with increased arterial stiffness, which is correlated with progression of diabetic nephropathy and increased systemic vascular risk (3–7).

The relationship between arterial stiffness and renal hyperfiltration, which is the earliest preclinical manifestation of diabetic renal microvascular dysfunction, is currently unknown.

Accordingly, we studied arterial stiffness in subjects based on renal filtration status to further elucidate the relationship between early renal and systemic abnormalities in diabetes (3,8). We hypothesized that arterial stiffness would be lower in hyperfiltering subjects (glomerular filtration rate [GFR]  $\geq 135$  ml/min/1.73 m<sup>2</sup>) than in individuals with normofiltration (GFR  $< 135$  ml/min/1.73 m<sup>2</sup>). Further-

more, we hypothesized that hyperfiltering subjects would exhibit higher levels of vasodilators.

## RESEARCH DESIGN AND METHODS

Augmentation index (AIx), pulse wave velocity (PWV), and renal hemodynamic parameters were measured during euglycemia (4–6 mmol/l) and hyperglycemia (9–11 mmol/l) on 2 consecutive days for 6 h by a modified clamp technique (8,9). In the left arm, a peripheral venous cannula was inserted for infusion of glucose and insulin, and a second cannula was inserted for blood sampling more distally.

Peripheral blood pressure was first measured in the brachial artery with an automated DINAMAP sphygmomanometer (Critikon, Tampa, FL). Right radial artery waveforms were recorded with a high-fidelity micromanometer (SPC-301; Millar Instruments, Houston, TX), and using the validated transfer function, corresponding central aortic pressure waveforms were generated (SphygmoCor, Sydney, Australia). AIx and aortic PWV were measured as described previously (10). Data were analyzed by a single observer (D.Z.I.C.) who was blinded to the glycemic day, renal hemodynamic measurements, and filtration status.

After the arterial stiffness studies, a third intravenous line was then inserted into the right arm and connected to a syringe infusion pump to measure renal hemodynamic function (8,9,11). Inulin- and paraaminohippurate-derived measures of GFR and effective renal plasma flow were taken. Circulating renin-angiotensin system mediators, urine and plasma cGMP, and insulin levels were also measured (8,11).

Data were analyzed on the basis of renal filtration status (online appendix A, available at <http://care.diabetesjournals.org/cgi/content/full/dc10-0767/DC1>) (2,8,9). Based on previous work examining the effect of clamped hyperglycemia on arterial stiffness and a 10% standard deviation (12), our study had a  $>80\%$  power to detect 10% differences in arterial stiffness at the 0.05 level of significance. Between-group baseline comparisons were made using para-

From the <sup>1</sup>Toronto General Hospital, Division of Nephrology, Department of Medicine, University of Toronto, Toronto, Ontario, Canada; the <sup>2</sup>Division of Pediatric Endocrinology, Department of Pediatrics, Hospital for Sick Children, University of Toronto, Toronto, Ontario, Canada; and the <sup>3</sup>Division of Pediatric Cardiology, Department of Pediatrics, Hospital for Sick Children, University of Toronto, Toronto, Ontario, Canada.

Corresponding author: David Z.I. Chorney, david.chorney@uhn.on.ca.

Received 26 April 2010 and accepted 19 June 2010. Published ahead of print at <http://care.diabetesjournals.org> on 28 June 2010. DOI: 10.2337/dc10-0767.

© 2010 by the American Diabetes Association. Readers may use this article as long as the work is properly cited, the use is educational and not for profit, and the work is not altered. See <http://creativecommons.org/licenses/by-nc-nd/3.0/> for details.

The costs of publication of this article were defrayed in part by the payment of page charges. This article must therefore be hereby marked "advertisement" in accordance with 18 U.S.C. Section 1734 solely to indicate this fact.

**Table 1—Arterial stiffness, blood pressure, and renal hemodynamic function responses during clamped euglycemia and hyperglycemia in hyperfiltering and normofiltering subjects with uncomplicated type 1 diabetes**

|                                                           | Hyperfiltering group<br>(n = 20) |               | Normofiltering group<br>(n = 18) |               |
|-----------------------------------------------------------|----------------------------------|---------------|----------------------------------|---------------|
|                                                           | Euglycemia                       | Hyperglycemia | Euglycemia                       | Hyperglycemia |
| <b>Circulating factors</b>                                |                                  |               |                                  |               |
| Urine cGMP (pmol/l)                                       | 957 ± 326                        | 426 ± 101     | 287 ± 79*                        | 126 ± 50†     |
| Plasma cGMP (pmol/l)                                      | 4.8 ± 0.7                        | 4.9 ± 0.5     | 2.7 ± 0.5*                       | 2.6 ± 0.3†    |
| Angiotensin II (pg/ml)                                    | 5.4 ± 2.0                        | 3.3 ± 0.8     | 3.3 ± 0.7                        | 3.3 ± 0.9     |
| Aldosterone (pmol/l)                                      | 167 ± 45                         | 166 ± 33      | 109 ± 18                         | 130 ± 32      |
| Plasma insulin (pmol/l)                                   | 129 ± 40                         | 125 ± 42      | 118 ± 36                         | 113 ± 35      |
| <b>Systemic hemodynamic function</b>                      |                                  |               |                                  |               |
| AIx (%)                                                   | −6.1 ± 2.9                       | −5.3 ± 3.5    | 11.5 ± 2.6*                      | 10.2 ± 2.3†   |
| Aortic PWV (m/s)                                          | 6.85 ± 0.22                      | 6.87 ± 0.19   | 6.90 ± 0.26                      | 6.82 ± 0.30   |
| Systolic blood pressure (mmHg)                            | 117 ± 10                         | 115 ± 10      | 113 ± 8                          | 115 ± 10      |
| Diastolic blood pressure (mmHg)                           | 65 ± 8                           | 63 ± 5        | 61 ± 5                           | 61 ± 4        |
| Mean arterial pressure (mmHg)                             | 80 ± 9                           | 79 ± 6        | 75 ± 6                           | 76 ± 5        |
| Heart rate (bpm)                                          | 71 ± 12                          | 71 ± 13       | 69 ± 15                          | 70 ± 13       |
| <b>Renal hemodynamic function</b>                         |                                  |               |                                  |               |
| Effective renal plasma flow (ml/min/1.73 m <sup>2</sup> ) | 693 ± 70                         | 733 ± 94      | 670 ± 70                         | 701 ± 79      |
| GFR (ml/min/1.73 m <sup>2</sup> )                         | 144 ± 3                          | 149 ± 7       | 120 ± 3*                         | 137 ± 6‡      |
| Filtration fraction                                       | 0.20 ± 0.03                      | 0.20 ± 0.03   | 0.18 ± 0.01*                     | 0.20 ± 0.01‡  |
| RBF (ml/min/1.73 m <sup>2</sup> )                         | 1,147 ± 28                       | 1,210 ± 39    | 1,081 ± 40                       | 1,125 ± 39    |
| RVR (mmHg/l/min)                                          | 0.068 ± 0.004                    | 0.066 ± 0.003 | 0.070 ± 0.004                    | 0.069 ± 0.003 |

Data are means ± SD. AIx, radial augmentation index corrected to an average heart rate of 75 bpm; aortic PWV, carotid-femoral pulse wave velocity RBF, renal blood flow (effective renal plasma flow/[1 − hematocrit]); RVR, renal vascular resistance, derived by dividing the mean arterial pressure by RBF. Filtration fraction is determined by dividing the GFR by the effective renal plasma flow. \**P* < 0.001 in hyperfiltering vs. normofiltering subjects during clamped euglycemia. †*P* < 0.048 in hyperfiltering vs. normofiltering subjects during clamped hyperglycemia. ‡*P* < 0.025 for the within-group effect of clamped hyperglycemia.

metric methods (unpaired *t* test). Between-group and within-group differences in all hemodynamic parameters were determined by repeated-measures ANOVA (SPSS, version 14.0).

The University Health Network and Hospital for Sick Children (Toronto, Canada) Research Ethics Boards approved the protocols, and patients gave informed consent.

**RESULTS**— Clinical parameters in the two groups were similar at baseline (online appendix B). AIx was lower in hyperfiltering versus normofiltering subjects during clamped euglycemia; values for PWV were similar in the two groups (Table 1). Urinary and plasma cGMP, GFR, and filtration fraction were higher in hyperfiltering subjects; plasma aldosterone, angiotensin II, insulin levels, effective renal plasma flow, renal blood flow,

and renal vascular resistance were similar in the two groups.

During clamped hyperglycemia, between-group differences in cGMP and AIx remained significant (Table 1). There were no observed within-group differences in AIx or PWV, but as expected, clamped hyperglycemia was associated with increases in GFR and filtration fraction in normofiltering subjects.

**CONCLUSIONS**— Early type 1 diabetes is commonly accompanied by renal hyperfiltration. Although renal hyperfiltration is related to the eventual development of clinical diabetic nephropathy in some individuals, the risk of nephropathy is also affected by a number of other factors including differences in blood pressure or glycemic control, and age at diagnosis (13). Previous work has described differences in the regulation of

the renal and, more recently, the systemic circulation in hyperfiltering versus normofiltering subjects (2,8). To our knowledge, this is the first time that arterial stiffness has been measured in type 1 diabetic subjects who were analyzed on the basis of renal filtration status. Our first major observation was that AIx was lower in hyperfiltering subjects, while aortic PWV was similar. This suggests that AIx reflecting smaller peripheral resistance artery stiffness segregates based on filtration status, whereas aortic PWV reflecting larger central conduit artery stiffness does not. Higher urinary and plasma cGMP levels support the concept of increased nitric oxide bioactivity in hyperfiltering subjects with uncomplicated type 1 diabetes, leading to generalized vasodilation and decreased peripheral and renal vascular resistance with an elevated GFR.

We used a hyperglycemic clamp target of 9–11 mmol/l to avoid an osmotic diuresis and renin angiotensin system activation and have previously observed exaggerated renal responses to hyperglycemia in normofiltering subjects (8). In the current study, the renal response to hyperglycemia was not accompanied by changes in AIx. In contrast, Gordin et al. (12) reported that under higher 15 mmol/l hyperglycemic conditions, AIx increases. Taken together, this suggests that renal hemodynamic function may be more sensitive to acute changes in blood glucose levels compared with arterial stiffness, where changes may depend on longer-term glycemic control (14).

This study has important limitations. We attempted to limit the effect of sample size by studying a homogeneous cohort. Given the narrow age of subjects, the findings cannot be generalized to older individuals with diabetes.

In conclusion, renal hyperfiltration in uncomplicated type 1 diabetes is associated with lower values for arterial stiffness, suggesting that hyperfiltration identifies a group of subjects with generalized changes in vascular function.

**Acknowledgments**— This work was supported by operating grants from the Juvenile Diabetes Research Foundation (to E.B.S.) and the Canadian Diabetes Association (to D.Z.I.C.). D.Z.I.C. was a recipient of a Kidney Foundation of Canada Scholarship and a Canadian Diabetes Association–KRESCENT Program New Investigator Award and receives operating support from the Canadian Institutes of Health Research (CIHR), Canadian Diabetes Association, and the Heart and Stroke

Foundation of Canada. J.W.S. is the CIHR/ Applied Molecular Genetics (AMGEN) Canada Kidney Research Chair at the University Health Network, University of Toronto.

No potential conflicts of interest relevant to this article were reported.

D.Z.I.C. researched data and wrote the manuscript. E.B.S. wrote the manuscript. V.L., M.G.D., and C.S. researched data. J.W.S. contributed to discussion and reviewed/edited the manuscript. T.J.B. researched data and wrote the manuscript.

### References

1. Chiarelli F, Cipollone F, Romano F, Tumini S, Costantini F, di Ricco L, Pomilio M, Pierdomenico SD, Marini M, Cuccurullo F, Mezzetti A. Increased circulating nitric oxide in young patients with type 1 diabetes and persistent microalbuminuria: relation to glomerular hyperfiltration. *Diabetes* 2000;49:1258–1263
2. Cherney DZ, Miller JA, Scholey JW, Nasrallah R, Hebert RL, Dekker MG, Slorach C, Sochetti EB, Bradley TJ. Renal hyperfiltration is a determinant of endothelial function responses to cyclooxygenase 2 inhibition in type 1 diabetes. *Diabetes Care* 2010;33:1344–1346
3. Smith A, Karalliedde J, De Angelis L, Goldsmith D, Viberti G. Aortic pulse wave velocity and albuminuria in patients with type 2 diabetes. *J Am Soc Nephrol* 2005;16:1069–1075
4. Cruickshank K, Riste L, Anderson SG, Wright JS, Dunn G, Gosling RG. Aortic pulse-wave velocity and its relationship to mortality in diabetes and glucose intolerance: an integrated index of vascular function? *Circulation* 2002;106:2085–2090
5. Pessina AC. Target organs of individuals with diabetes caught between arterial stiffness and damage to the microcirculation. *J Hypertens Suppl* 2007;25:S13–S18
6. Hamano K, Nitta A, Ohtake T, Kobayashi S. Associations of renal vascular resistance with albuminuria and other macroangiopathy in type 2 diabetic patients. *Diabetes Care* 2008;31:1853–1857
7. Nosadini R, Velussi M, Brocco E, Abaterusso C, Carraro A, Piarulli F, Morgia G, Satta A, Faedda R, Abhyankar A, Luthman H, Tonolo G. Increased renal arterial resistance predicts the course of renal function in type 2 diabetes with microalbuminuria. *Diabetes* 2006;55:234–239
8. Cherney DZ, Miller JA, Scholey JW, Bradley TJ, Slorach C, Curtis JR, Dekker MG, Nasrallah R, Hébert RL, Sochetti EB. The effect of cyclooxygenase-2 inhibition on renal hemodynamic function in humans with type 1 diabetes. *Diabetes* 2008;57:688–695
9. Sochetti EB, Cherney DZ, Curtis JR, Dekker MG, Scholey JW, Miller JA. Impact of renin angiotensin system modulation on the hyperfiltration state in type 1 diabetes. *J Am Soc Nephrol* 2006;17:1703–1709
10. Cherney DZ, Lai V, Scholey JW, Miller JA, Zinman B, Reich HN. Effect of direct renin inhibition on renal hemodynamic function, arterial stiffness, and endothelial function in humans with uncomplicated type 1 diabetes: a pilot study. *Diabetes Care* 2010;33:361–365
11. Cherney DZ, Scholey JW, Cattran DC, Kang AK, Zimpelmann J, Kennedy C, Lai V, Burns KD, Miller JA. The effect of oral contraceptives on the nitric oxide system and renal function. *Am J Physiol Renal Physiol* 2007;293:F1539–F1544
12. Gordin D, Rönnback M, Forsblom C, Heikkilä O, Saraheimo M, Groop PH. Acute hyperglycaemia rapidly increases arterial stiffness in young patients with type 1 diabetes. *Diabetologia* 2007;50:1808–1814
13. Magee GM, Bilous RW, Cardwell CR, Hunter SJ, Kee F, Fogarty DG. Is hyperfiltration associated with the future risk of developing diabetic nephropathy? A meta-analysis. *Diabetologia* 2009;52:691–697
14. Sims TJ, Rasmussen LM, Oxlund H, Bailey AJ. The role of glycation cross-links in diabetic vascular stiffening. *Diabetologia* 1996;39:946–951
